# Supplementary material
Source: publisher site journal article supplement (https://www.spandidos-publications.com/4044/downloadSupplementary)
Supplement: Supplementary file 1 [file downloadSupplementary]

## Sheet: Wildtype EWSR1
Table SV. Wildtype EWSR1 PSI values.
Overview on how the inclusion junction counts and the exclusion junction counts are distributed for wildtype EWSR1 over all samples.
Only E1 SP-hFIB (A3) and E3 MSC-hFIB (A3, RI) might show some spurious effect in the JC section.
The JCEC section does not change/ improve the JC results.
It is obvious that wildtype EWSR1 is not DS for the sets of interest.
Header description
s1, s2: sample 1 and sample 2 of the DS
IJC: inclusion read counts
SJC: exclusion (skipping) read counts
PSI: percentage spliced-in
Approach	Set name	Samples	Splice type	Gene symbol	PSI s1	PSI s2	s1 IJC counts	s1 SJC counts	s2 IJC counts	s2 SJC counts
JC	B2	NSP-MSC	SE	EWSR1	0.94	0.99	583	37	356	4
	C1	NSP-nst	SE	EWSR1	0.94	0.99	583	37	469	5
	E1	SP-hFIB	A3	EWSR1	0.58	0.93	46	34	13	1
	E1	SP-hFIB	RI	EWSR1	0.27	0.19	17	46	3	13
	E2	NSP-hFIB	A3	EWSR1	0.08	0.03	35	386	3	90
	E3	MSC-hFIB	A3	EWSR1	0.66	0.93	25	13	13	1
	E3	MSC-hFIB	RI	EWSR1	0.56	0.19	32	25	3	13
	G2fli	NSP-ES2	RI	EWSR1	0.7	1	19	8	2	0
	H2fli	SP-ES2	RI	EWSR1	0.54	1	15	13	2	0
JCEC	B2	NSP-MSC	SE	EWSR1	0.98	1	2197	37	1349	4
	C1	NSP-nst	SE	EWSR1	0.98	1	2197	37	2340	5
	D	SP-MSC	MX	EWSR1	0.95	0.98	899	52	940	20
	D	SP-MSC	RI	EWSR1	0.98	0.99	283	7	330	3
	E1	SP-hFIB	A3	EWSR1	0.58	0.93	46	34	13	1
	E1	SP-hFIB	MX	EWSR1	0.95	0.99	899	52	376	2
	E1	SP-hFIB	RI	EWSR1	0.99	1	4009	34	993	1
	E1	SP-hFIB	RI	EWSR1	0.98	1	283	7	116	0
	E1	SP-hFIB	RI	EWSR1	0.9	0.93	116	13	25	2
	E2	NSP-hFIB	A3	EWSR1	0.08	0.03	35	386	3	90
	E2	NSP-hFIB	MX	EWSR1	0.97	0.99	1241	44	376	2
	E2	NSP-hFIB	RI	EWSR1	1	1	3471	17	993	1
	E2	NSP-hFIB	RI	EWSR1	0.88	0.93	58	8	25	2
	E2	NSP-hFIB	RI	EWSR1	0.99	1	540	6	116	0
	E2	NSP-hFIB	SE	EWSR1	0.98	1	2197	37	613	3
	E3	MSC-hFIB	A3	EWSR1	0.66	0.93	25	13	13	1
	E3	MSC-hFIB	MX	EWSR1	0.98	0.99	940	20	376	2
	E3	MSC-hFIB	RI	EWSR1	0.99	1	2527	13	993	1
	G1erg	NSP-ES1	RI	EWSR1	0.88	1	58	8	6	0
	G1erg	NSP-ES1	RI	EWSR1	0.99	1	3472	38	244	0
	G1erg	NSP-ES1	RI	EWSR1	1	1	3471	17	244	0
	G2fli	NSP-ES2	A3	EWSR1	0.08	0	35	386	0	31
	G2fli	NSP-ES2	MX	EWSR1	0.97	0.62	1241	44	23	14
	G2fli	NSP-ES2	RI	EWSR1	0.88	1	58	8	9	0
	H1erg	SP-ES1	RI	EWSR1	0.9	1	116	13	6	0
	H1erg	SP-ES1	RI	EWSR1	0.99	1	4006	46	244	0
	H1erg	SP-ES1	RI	EWSR1	0.99	1	4009	34	244	0
	H2fli	SP-ES2	RI	EWSR1	0.9	1	116	13	9	0
